# Supplementary material for: Deep learning based joint fusion approach to exploit anatomical and functional brain information in autism spectrum disorders
Source: Brain Inform. 2024 Jan 9;11(1):2. doi: 10.1186/s40708-023-00217-4 (PMC10776521; doi:10.1186/s40708-023-00217-4)
Supplement: Supplementary file 1 — Additional file 1. Sheet list of features: List of analyzed brain structural features. Sheet IDs of the participants: List of ID subjects per site selected in the final sample of the study. [file 40708_2023_217_MOESM1_ESM.xlsx]

## Sheet: LIST OF FEATURES
Cortical features	Subcortical and other volumes	Global measures
lh_caudalanteriorcingulate_GrayVol	Left-Cerebellum-White-Matter_Volume_mm3	lh_MeanThickness
lh_caudalanteriorcingulate_ThickAvg	Left-Cerebellum-Cortex_Volume_mm3	rh_MeanThickness
lh_caudalanteriorcingulate_ThickStd	Left-Thalamus-Proper_Volume_mm3	lhCortexVol
lh_caudalmiddlefrontal_GrayVol	Left-Caudate_Volume_mm3	rhCortexVol
lh_caudalmiddlefrontal_ThickAvg	Left-Putamen_Volume_mm3	lhCerebralWhiteMatterVol
lh_caudalmiddlefrontal_ThickStd	Left-Pallidum_Volume_mm3	rhCerebralWhiteMatterVol
lh_cuneus_GrayVol	Brain-Stem_Volume_mm3	TotalGrayVol
lh_cuneus_ThickAvg	Left-Hippocampus_Volume_mm3	BrainSegVolNotVent
lh_cuneus_ThickStd	Left-Amygdala_Volume_mm3
lh_entorhinal_GrayVol	CSF_Volume_mm3
lh_entorhinal_ThickAvg	Left-Accumbens-area_Volume_mm3
lh_entorhinal_ThickStd	Left-VentralDC_Volume_mm3
lh_fusiform_GrayVol	Right-Cerebellum-White-Matter_Volume_mm3
lh_fusiform_ThickAvg	Right-Cerebellum-Cortex_Volume_mm3
lh_fusiform_ThickStd	Right-Thalamus-Proper_Volume_mm3
lh_inferiorparietal_GrayVol	Right-Caudate_Volume_mm3
lh_inferiorparietal_ThickAvg	Right-Putamen_Volume_mm3
lh_inferiorparietal_ThickStd	Right-Pallidum_Volume_mm3
lh_inferiortemporal_GrayVol	Right-Hippocampus_Volume_mm3
lh_inferiortemporal_ThickAvg	Right-Amygdala_Volume_mm3
lh_inferiortemporal_ThickStd	Right-Accumbens-area_Volume_mm3
lh_isthmuscingulate_GrayVol	Right-VentralDC_Volume_mm3
lh_isthmuscingulate_ThickAvg	CC_Posterior_Volume_mm3
lh_isthmuscingulate_ThickStd	CC_Mid_Posterior_Volume_mm3
lh_lateraloccipital_GrayVol	CC_Central_Volume_mm3
lh_lateraloccipital_ThickAvg	CC_Mid_Anterior_Volume_mm3
lh_lateraloccipital_ThickStd	CC_Anterior_Volume_mm3
lh_lateralorbitofrontal_GrayVol
lh_lateralorbitofrontal_ThickAvg
lh_lateralorbitofrontal_ThickStd
lh_lingual_GrayVol
lh_lingual_ThickAvg
lh_lingual_ThickStd
lh_medialorbitofrontal_GrayVol
lh_medialorbitofrontal_ThickAvg
lh_medialorbitofrontal_ThickStd
lh_middletemporal_GrayVol
lh_middletemporal_ThickAvg
lh_middletemporal_ThickStd
lh_parahippocampal_GrayVol
lh_parahippocampal_ThickAvg
lh_parahippocampal_ThickStd
lh_paracentral_GrayVol
lh_paracentral_ThickAvg
lh_paracentral_ThickStd
lh_parsopercularis_GrayVol
lh_parsopercularis_ThickAvg
lh_parsopercularis_ThickStd
lh_parsorbitalis_GrayVol
lh_parsorbitalis_ThickAvg
lh_parsorbitalis_ThickStd
lh_parstriangularis_GrayVol
lh_parstriangularis_ThickAvg
lh_parstriangularis_ThickStd
lh_pericalcarine_GrayVol
lh_pericalcarine_ThickAvg
lh_pericalcarine_ThickStd
lh_postcentral_GrayVol
lh_postcentral_ThickAvg
lh_postcentral_ThickStd
lh_posteriorcingulate_GrayVol
lh_posteriorcingulate_ThickAvg
lh_posteriorcingulate_ThickStd
lh_precentral_GrayVol
lh_precentral_ThickAvg
lh_precentral_ThickStd
lh_precuneus_GrayVol
lh_precuneus_ThickAvg
lh_precuneus_ThickStd
lh_rostralanteriorcingulate_GrayVol
lh_rostralanteriorcingulate_ThickAvg
lh_rostralanteriorcingulate_ThickStd
lh_rostralmiddlefrontal_GrayVol
lh_rostralmiddlefrontal_ThickAvg
lh_rostralmiddlefrontal_ThickStd
lh_superiorfrontal_GrayVol
lh_superiorfrontal_ThickAvg
lh_superiorfrontal_ThickStd
lh_superiorparietal_GrayVol
lh_superiorparietal_ThickAvg
lh_superiorparietal_ThickStd
lh_superiortemporal_GrayVol
lh_superiortemporal_ThickAvg
lh_superiortemporal_ThickStd
lh_supramarginal_GrayVol
lh_supramarginal_ThickAvg
lh_supramarginal_ThickStd
lh_transversetemporal_GrayVol
lh_transversetemporal_ThickAvg
lh_transversetemporal_ThickStd
lh_insula_GrayVol
lh_insula_ThickAvg
lh_insula_ThickStd
rh_caudalanteriorcingulate_GrayVol
rh_caudalanteriorcingulate_ThickAvg
rh_caudalanteriorcingulate_ThickStd
rh_caudalmiddlefrontal_GrayVol
rh_caudalmiddlefrontal_ThickAvg
rh_caudalmiddlefrontal_ThickStd
rh_cuneus_GrayVol
rh_cuneus_ThickAvg
rh_cuneus_ThickStd
rh_entorhinal_GrayVol
rh_entorhinal_ThickAvg
rh_entorhinal_ThickStd
rh_fusiform_GrayVol
rh_fusiform_ThickAvg
rh_fusiform_ThickStd
rh_inferiorparietal_GrayVol
rh_inferiorparietal_ThickAvg
rh_inferiorparietal_ThickStd
rh_inferiortemporal_GrayVol
rh_inferiortemporal_ThickAvg
rh_inferiortemporal_ThickStd
rh_isthmuscingulate_GrayVol
rh_isthmuscingulate_ThickAvg
rh_isthmuscingulate_ThickStd
rh_lateraloccipital_GrayVol
rh_lateraloccipital_ThickAvg
rh_lateraloccipital_ThickStd
rh_lateralorbitofrontal_GrayVol
rh_lateralorbitofrontal_ThickAvg
rh_lateralorbitofrontal_ThickStd
rh_lingual_GrayVol
rh_lingual_ThickAvg
rh_lingual_ThickStd
rh_medialorbitofrontal_GrayVol
rh_medialorbitofrontal_ThickAvg
rh_medialorbitofrontal_ThickStd
rh_middletemporal_GrayVol
rh_middletemporal_ThickAvg
rh_middletemporal_ThickStd
rh_parahippocampal_GrayVol
rh_parahippocampal_ThickAvg
rh_parahippocampal_ThickStd
rh_paracentral_GrayVol
rh_paracentral_ThickAvg
rh_paracentral_ThickStd
rh_parsopercularis_GrayVol
rh_parsopercularis_ThickAvg
rh_parsopercularis_ThickStd
rh_parsorbitalis_GrayVol
rh_parsorbitalis_ThickAvg
rh_parsorbitalis_ThickStd
rh_parstriangularis_GrayVol
rh_parstriangularis_ThickAvg
rh_parstriangularis_ThickStd
rh_pericalcarine_GrayVol
rh_pericalcarine_ThickAvg
rh_pericalcarine_ThickStd
rh_postcentral_GrayVol
rh_postcentral_ThickAvg
rh_postcentral_ThickStd
rh_posteriorcingulate_GrayVol
rh_posteriorcingulate_ThickAvg
rh_posteriorcingulate_ThickStd
rh_precentral_GrayVol
rh_precentral_ThickAvg
rh_precentral_ThickStd
rh_precuneus_GrayVol
rh_precuneus_ThickAvg
rh_precuneus_ThickStd
rh_rostralanteriorcingulate_GrayVol
rh_rostralanteriorcingulate_ThickAvg
rh_rostralanteriorcingulate_ThickStd
rh_rostralmiddlefrontal_GrayVol
rh_rostralmiddlefrontal_ThickAvg
rh_rostralmiddlefrontal_ThickStd
rh_superiorfrontal_GrayVol
rh_superiorfrontal_ThickAvg
rh_superiorfrontal_ThickStd
rh_superiorparietal_GrayVol
rh_superiorparietal_ThickAvg
rh_superiorparietal_ThickStd
rh_superiortemporal_GrayVol
rh_superiortemporal_ThickAvg
rh_superiortemporal_ThickStd
rh_supramarginal_GrayVol
rh_supramarginal_ThickAvg
rh_supramarginal_ThickStd
rh_transversetemporal_GrayVol
rh_transversetemporal_ThickAvg
rh_transversetemporal_ThickStd
rh_insula_GrayVol
rh_insula_ThickAvg
rh_insula_ThickStd

## Sheet: IDs of the participants 
ID patient	Database Abide	SITE
51457	1.0	CALTECH
51458	1.0	CALTECH
51459	1.0	CALTECH
51461	1.0	CALTECH
51464	1.0	CALTECH
51465	1.0	CALTECH
51466	1.0	CALTECH
51467	1.0	CALTECH
51468	1.0	CALTECH
51472	1.0	CALTECH
51473	1.0	CALTECH
51474	1.0	CALTECH
50642	1.0	CMU
50646	1.0	CMU
50647	1.0	CMU
50649	1.0	CMU
50653	1.0	CMU
50654	1.0	CMU
50652	1.0	CMU
50791	1.0	KKI
50799	1.0	KKI
50800	1.0	KKI
50801	1.0	KKI
50802	1.0	KKI
50804	1.0	KKI
50805	1.0	KKI
50806	1.0	KKI
50807	1.0	KKI
50815	1.0	KKI
50823	1.0	KKI
50825	1.0	KKI
50826	1.0	KKI
50686	1.0	LEUVEN_1
50689	1.0	LEUVEN_1
50690	1.0	LEUVEN_1
50695	1.0	LEUVEN_1
50696	1.0	LEUVEN_1
50697	1.0	LEUVEN_1
50700	1.0	LEUVEN_1
50704	1.0	LEUVEN_1
50708	1.0	LEUVEN_1
50745	1.0	LEUVEN_2
50746	1.0	LEUVEN_2
50747	1.0	LEUVEN_2
50748	1.0	LEUVEN_2
50750	1.0	LEUVEN_2
50751	1.0	LEUVEN_2
50753	1.0	LEUVEN_2
50754	1.0	LEUVEN_2
50755	1.0	LEUVEN_2
50756	1.0	LEUVEN_2
51318	1.0	MAX_MUN
51319	1.0	MAX_MUN
51320	1.0	MAX_MUN
51607	1.0	MAX_MUN
51322	1.0	MAX_MUN
51323	1.0	MAX_MUN
51328	1.0	MAX_MUN
51348	1.0	MAX_MUN
51329	1.0	MAX_MUN
51331	1.0	MAX_MUN
51349	1.0	MAX_MUN
51350	1.0	MAX_MUN
51351	1.0	MAX_MUN
51354	1.0	MAX_MUN
51355	1.0	MAX_MUN
50964	1.0	NYU
50965	1.0	NYU
50966	1.0	NYU
50967	1.0	NYU
50968	1.0	NYU
50969	1.0	NYU
50970	1.0	NYU
50971	1.0	NYU
50972	1.0	NYU
50973	1.0	NYU
50974	1.0	NYU
50975	1.0	NYU
50976	1.0	NYU
50977	1.0	NYU
50978	1.0	NYU
50980	1.0	NYU
50981	1.0	NYU
50982	1.0	NYU
50983	1.0	NYU
50985	1.0	NYU
50987	1.0	NYU
50988	1.0	NYU
50989	1.0	NYU
50990	1.0	NYU
50991	1.0	NYU
50992	1.0	NYU
50993	1.0	NYU
50994	1.0	NYU
50995	1.0	NYU
50996	1.0	NYU
50997	1.0	NYU
50998	1.0	NYU
50999	1.0	NYU
51000	1.0	NYU
51002	1.0	NYU
51003	1.0	NYU
51006	1.0	NYU
51007	1.0	NYU
51008	1.0	NYU
51009	1.0	NYU
51010	1.0	NYU
51011	1.0	NYU
51012	1.0	NYU
51013	1.0	NYU
51014	1.0	NYU
51015	1.0	NYU
51016	1.0	NYU
51017	1.0	NYU
51018	1.0	NYU
51019	1.0	NYU
51021	1.0	NYU
51023	1.0	NYU
51024	1.0	NYU
51025	1.0	NYU
51026	1.0	NYU
51027	1.0	NYU
51028	1.0	NYU
51029	1.0	NYU
51030	1.0	NYU
51032	1.0	NYU
51033	1.0	NYU
51034	1.0	NYU
50142	1.0	OHSU
50143	1.0	OHSU
50144	1.0	OHSU
50145	1.0	OHSU
50146	1.0	OHSU
50147	1.0	OHSU
50148	1.0	OHSU
50149	1.0	OHSU
50150	1.0	OHSU
50152	1.0	OHSU
50153	1.0	OHSU
50155	1.0	OHSU
50156	1.0	OHSU
50118	1.0	OLIN
50120	1.0	OLIN
50121	1.0	OLIN
50122	1.0	OLIN
50123	1.0	OLIN
50124	1.0	OLIN
50126	1.0	OLIN
50128	1.0	OLIN
50129	1.0	OLIN
50130	1.0	OLIN
50131	1.0	OLIN
50132	1.0	OLIN
50133	1.0	OLIN
50134	1.0	OLIN
50135	1.0	OLIN
50137	1.0	OLIN
50002	1.0	PITT
50003	1.0	PITT
50004	1.0	PITT
50006	1.0	PITT
50007	1.0	PITT
50008	1.0	PITT
50009	1.0	PITT
50010	1.0	PITT
50011	1.0	PITT
50012	1.0	PITT
50013	1.0	PITT
50014	1.0	PITT
50015	1.0	PITT
50016	1.0	PITT
50017	1.0	PITT
50019	1.0	PITT
50020	1.0	PITT
50022	1.0	PITT
50024	1.0	PITT
50025	1.0	PITT
50026	1.0	PITT
50027	1.0	PITT
50028	1.0	PITT
50053	1.0	PITT
50055	1.0	PITT
50056	1.0	PITT
51571	1.0	SBL
51572	1.0	SBL
51573	1.0	SBL
51574	1.0	SBL
51576	1.0	SBL
51577	1.0	SBL
51578	1.0	SBL
51582	1.0	SBL
51583	1.0	SBL
51585	1.0	SBL
50183	1.0	SDSU
50184	1.0	SDSU
50186	1.0	SDSU
50188	1.0	SDSU
50189	1.0	SDSU
50190	1.0	SDSU
50191	1.0	SDSU
50192	1.0	SDSU
50212	1.0	SDSU
50216	1.0	SDSU
51161	1.0	STANFORD
51163	1.0	STANFORD
51165	1.0	STANFORD
51166	1.0	STANFORD
51168	1.0	STANFORD
51169	1.0	STANFORD
51171	1.0	STANFORD
51172	1.0	STANFORD
51173	1.0	STANFORD
51174	1.0	STANFORD
51175	1.0	STANFORD
51176	1.0	STANFORD
51177	1.0	STANFORD
51178	1.0	STANFORD
51179	1.0	STANFORD
50232	1.0	TRINITY
50233	1.0	TRINITY
50234	1.0	TRINITY
50235	1.0	TRINITY
50236	1.0	TRINITY
50237	1.0	TRINITY
50238	1.0	TRINITY
50239	1.0	TRINITY
50240	1.0	TRINITY
50241	1.0	TRINITY
50242	1.0	TRINITY
50243	1.0	TRINITY
50244	1.0	TRINITY
50245	1.0	TRINITY
50246	1.0	TRINITY
50247	1.0	TRINITY
50248	1.0	TRINITY
50249	1.0	TRINITY
50250	1.0	TRINITY
50251	1.0	TRINITY
50252	1.0	TRINITY
50253	1.0	TRINITY
50254	1.0	TRINITY
50255	1.0	TRINITY
51201	1.0	UCLA_1
51202	1.0	UCLA_1
51203	1.0	UCLA_1
51204	1.0	UCLA_1
51206	1.0	UCLA_1
51208	1.0	UCLA_1
51209	1.0	UCLA_1
51210	1.0	UCLA_1
51211	1.0	UCLA_1
51212	1.0	UCLA_1
51214	1.0	UCLA_1
51216	1.0	UCLA_1
51217	1.0	UCLA_1
51218	1.0	UCLA_1
51220	1.0	UCLA_1
51221	1.0	UCLA_1
51222	1.0	UCLA_1
51223	1.0	UCLA_1
51224	1.0	UCLA_1
51225	1.0	UCLA_1
51227	1.0	UCLA_1
51229	1.0	UCLA_1
51231	1.0	UCLA_1
51234	1.0	UCLA_1
51235	1.0	UCLA_1
51236	1.0	UCLA_1
51237	1.0	UCLA_1
51238	1.0	UCLA_1
51239	1.0	UCLA_1
51240	1.0	UCLA_1
51241	1.0	UCLA_1
51248	1.0	UCLA_1
51249	1.0	UCLA_1
51292	1.0	UCLA_2
51294	1.0	UCLA_2
51295	1.0	UCLA_2
51297	1.0	UCLA_2
51298	1.0	UCLA_2
51299	1.0	UCLA_2
51300	1.0	UCLA_2
51301	1.0	UCLA_2
51302	1.0	UCLA_2
51317	1.0	UCLA_2
50275	1.0	UM_1
50279	1.0	UM_1
50280	1.0	UM_1
50281	1.0	UM_1
50282	1.0	UM_1
50286	1.0	UM_1
50289	1.0	UM_1
50290	1.0	UM_1
50291	1.0	UM_1
50292	1.0	UM_1
50293	1.0	UM_1
50294	1.0	UM_1
50295	1.0	UM_1
50297	1.0	UM_1
50298	1.0	UM_1
50301	1.0	UM_1
50304	1.0	UM_1
50306	1.0	UM_1
50307	1.0	UM_1
50308	1.0	UM_1
50310	1.0	UM_1
50311	1.0	UM_1
50312	1.0	UM_1
50314	1.0	UM_1
50315	1.0	UM_1
50316	1.0	UM_1
50317	1.0	UM_1
50318	1.0	UM_1
50320	1.0	UM_1
50322	1.0	UM_1
50324	1.0	UM_1
50325	1.0	UM_1
50326	1.0	UM_1
50397	1.0	UM_2
50399	1.0	UM_2
50402	1.0	UM_2
50403	1.0	UM_2
50404	1.0	UM_2
50405	1.0	UM_2
50406	1.0	UM_2
50408	1.0	UM_2
50410	1.0	UM_2
50411	1.0	UM_2
50412	1.0	UM_2
50413	1.0	UM_2
50476	1.0	USM
50477	1.0	USM
50478	1.0	USM
50479	1.0	USM
50480	1.0	USM
50481	1.0	USM
50483	1.0	USM
50484	1.0	USM
50485	1.0	USM
50486	1.0	USM
50487	1.0	USM
50488	1.0	USM
50489	1.0	USM
50490	1.0	USM
50491	1.0	USM
50492	1.0	USM
50493	1.0	USM
50495	1.0	USM
50496	1.0	USM
50497	1.0	USM
50498	1.0	USM
50499	1.0	USM
50500	1.0	USM
50501	1.0	USM
50502	1.0	USM
50503	1.0	USM
50504	1.0	USM
50506	1.0	USM
50509	1.0	USM
50510	1.0	USM
50511	1.0	USM
50512	1.0	USM
50513	1.0	USM
50514	1.0	USM
50516	1.0	USM
50517	1.0	USM
50518	1.0	USM
50520	1.0	USM
50521	1.0	USM
50523	1.0	USM
50524	1.0	USM
50527	1.0	USM
50528	1.0	USM
50530	1.0	USM
50531	1.0	USM
50532	1.0	USM
50601	1.0	YALE
50602	1.0	YALE
50603	1.0	YALE
50606	1.0	YALE
50607	1.0	YALE
50608	1.0	YALE
50609	1.0	YALE
50610	1.0	YALE
50611	1.0	YALE
50612	1.0	YALE
50613	1.0	YALE
50614	1.0	YALE
50616	1.0	YALE
50617	1.0	YALE
50618	1.0	YALE
50622	1.0	YALE
50625	1.0	YALE
50626	1.0	YALE
50628	1.0	YALE
28677	2.0	OILH_2
28679	2.0	OILH_2
28688	2.0	OILH_2
28690	2.0	OILH_2
28694	2.0	OILH_2
28695	2.0	OILH_2
28696	2.0	OILH_2
28752	2.0	GU_1
28761	2.0	GU_1
28764	2.0	GU_1
28765	2.0	GU_1
28768	2.0	GU_1
28771	2.0	GU_1
28777	2.0	GU_1
28778	2.0	GU_1
28782	2.0	GU_1
28784	2.0	GU_1
28787	2.0	GU_1
28788	2.0	GU_1
28790	2.0	GU_1
28791	2.0	GU_1
28795	2.0	GU_1
28796	2.0	GU_1
28800	2.0	GU_1
28802	2.0	GU_1
28808	2.0	GU_1
28809	2.0	GU_1
28810	2.0	GU_1
28811	2.0	GU_1
28815	2.0	GU_1
28817	2.0	GU_1
28819	2.0	GU_1
28820	2.0	GU_1
28821	2.0	GU_1
28822	2.0	GU_1
28824	2.0	GU_1
28825	2.0	GU_1
28831	2.0	GU_1
28832	2.0	GU_1
28835	2.0	GU_1
28838	2.0	GU_1
28840	2.0	GU_1
28843	2.0	GU_1
28844	2.0	GU_1
28853	2.0	SDSU_1
28856	2.0	SDSU_1
28857	2.0	SDSU_1
28859	2.0	SDSU_1
28860	2.0	SDSU_1
28861	2.0	SDSU_1
28865	2.0	SDSU_1
28866	2.0	SDSU_1
28872	2.0	SDSU_1
28874	2.0	SDSU_1
28875	2.0	SDSU_1
28879	2.0	SDSU_1
28884	2.0	SDSU_1
28890	2.0	SDSU_1
28896	2.0	SDSU_1
28897	2.0	SDSU_1
28898	2.0	SDSU_1
28899	2.0	SDSU_1
28901	2.0	SDSU_1
28905	2.0	SDSU_1
28906	2.0	SDSU_1
28908	2.0	SDSU_1
28909	2.0	SDSU_1
28920	2.0	OHSU_1
28924	2.0	OHSU_1
28925	2.0	OHSU_1
28926	2.0	OHSU_1
28927	2.0	OHSU_1
28930	2.0	OHSU_1
28931	2.0	OHSU_1
28933	2.0	OHSU_1
28935	2.0	OHSU_1
28936	2.0	OHSU_1
28937	2.0	OHSU_1
28938	2.0	OHSU_1
28940	2.0	OHSU_1
28941	2.0	OHSU_1
28949	2.0	OHSU_1
28952	2.0	OHSU_1
28957	2.0	OHSU_1
28958	2.0	OHSU_1
28963	2.0	OHSU_1
28964	2.0	OHSU_1
28966	2.0	OHSU_1
28967	2.0	OHSU_1
28972	2.0	OHSU_1
28982	2.0	OHSU_1
28986	2.0	OHSU_1
28987	2.0	OHSU_1
28992	2.0	OHSU_1
28995	2.0	OHSU_1
28998	2.0	OHSU_1
29028	2.0	BNI_1
29029	2.0	BNI_1
29030	2.0	BNI_1
29031	2.0	BNI_1
29037	2.0	BNI_1
29039	2.0	BNI_1
29041	2.0	BNI_1
29042	2.0	BNI_1
29046	2.0	BNI_1
29052	2.0	BNI_1
29053	2.0	BNI_1
29055	2.0	BNI_1
29057	2.0	ETH_1
29058	2.0	ETH_1
29059	2.0	ETH_1
29060	2.0	ETH_1
29063	2.0	ETH_1
29064	2.0	ETH_1
29065	2.0	ETH_1
29066	2.0	ETH_1
29068	2.0	ETH_1
29070	2.0	ETH_1
29096	2.0	TCD_1
29097	2.0	TCD_1
29098	2.0	TCD_1
29099	2.0	TCD_1
29100	2.0	TCD_1
29101	2.0	TCD_1
29102	2.0	TCD_1
29103	2.0	TCD_1
29104	2.0	TCD_1
29105	2.0	TCD_1
29107	2.0	TCD_1
29108	2.0	TCD_1
29109	2.0	TCD_1
29110	2.0	TCD_1
29111	2.0	TCD_1
29112	2.0	TCD_1
29113	2.0	TCD_1
29114	2.0	TCD_1
29116	2.0	TCD_1
29178	2.0	NYU_1
29179	2.0	NYU_1
29180	2.0	NYU_1
29181	2.0	NYU_1
29182	2.0	NYU_1
29183	2.0	NYU_1
29184	2.0	NYU_1
29185	2.0	NYU_1
29186	2.0	NYU_1
29187	2.0	NYU_1
29188	2.0	NYU_1
29189	2.0	NYU_1
29190	2.0	NYU_1
29191	2.0	NYU_1
29192	2.0	NYU_1
29193	2.0	NYU_1
29194	2.0	NYU_1
29195	2.0	NYU_1
29196	2.0	NYU_1
29197	2.0	NYU_1
29198	2.0	NYU_1
29199	2.0	NYU_1
29200	2.0	NYU_1
29201	2.0	NYU_1
29202	2.0	NYU_1
29203	2.0	NYU_1
29204	2.0	NYU_1
29205	2.0	NYU_1
29206	2.0	NYU_1
29207	2.0	NYU_1
29208	2.0	NYU_1
29209	2.0	NYU_1
29210	2.0	NYU_1
29211	2.0	NYU_1
29214	2.0	NYU_1
29215	2.0	NYU_1
29216	2.0	NYU_1
29218	2.0	NYU_1
29219	2.0	NYU_1
29220	2.0	NYU_1
29223	2.0	NYU_1
29273	2.0	KKI_1
29274	2.0	KKI_1
29275	2.0	KKI_1
29277	2.0	KKI_1
29280	2.0	KKI_1
29281	2.0	KKI_1
29282	2.0	KKI_1
29284	2.0	KKI_1
29286	2.0	KKI_1
29288	2.0	KKI_1
29291	2.0	KKI_1
29292	2.0	KKI_1
29385	2.0	KKI_1
29389	2.0	KKI_1
29391	2.0	KKI_1
29392	2.0	KKI_1
29393	2.0	KKI_1
29394	2.0	KKI_1
29400	2.0	KKI_1
29401	2.0	KKI_1
29403	2.0	KKI_1
29404	2.0	KKI_1
29410	2.0	KKI_1
29413	2.0	KKI_1
29417	2.0	KKI_1
29430	2.0	KKI_1
29433	2.0	KKI_1
29456	2.0	KKI_1
29479	2.0	KKI_1
29482	2.0	KKI_1
29495	2.0	USM_1
29497	2.0	USM_1
29498	2.0	USM_1
29502	2.0	USM_1
29503	2.0	USM_1
29506	2.0	USM_1
29507	2.0	USM_1
29508	2.0	USM_1
29509	2.0	USM_1
29510	2.0	USM_1
29511	2.0	USM_1
29514	2.0	USM_1
29515	2.0	USM_1
29516	2.0	USM_1
29540	2.0	IU_1
29543	2.0	IU_1
29545	2.0	IU_1
29559	2.0	IU_1
29568	2.0	IU_1
29569	2.0	IU_1
29572	2.0	IU_1
29575	2.0	IU_1
29587	2.0	IP_1
29588	2.0	IP_1
29595	2.0	IP_1
29606	2.0	IP_1
29609	2.0	IP_1
29612	2.0	IP_1
29615	2.0	IP_1
29619	2.0	IP_1
29626	2.0	IP_1
29627	2.0	IP_1
29629	2.0	IP_1
29633	2.0	IP_1
29634	2.0	IP_1
29864	2.0	EMC_1
29865	2.0	EMC_1
29866	2.0	EMC_1
29868	2.0	EMC_1
29869	2.0	EMC_1
29870	2.0	EMC_1
29872	2.0	EMC_1
29873	2.0	EMC_1
29874	2.0	EMC_1
29876	2.0	EMC_1
29877	2.0	EMC_1
29878	2.0	EMC_1
29879	2.0	EMC_1
29881	2.0	EMC_1
29883	2.0	EMC_1
29884	2.0	EMC_1
29885	2.0	EMC_1
29886	2.0	EMC_1
29887	2.0	EMC_1
29888	2.0	EMC_1
29890	2.0	EMC_1
30003	2.0	UCD_1
30005	2.0	UCD_1
30010	2.0	UCD_1
30011	2.0	UCD_1
30013	2.0	UCD_1
30014	2.0	UCD_1
30016	2.0	UCD_1
30017	2.0	UCD_1
30018	2.0	UCD_1
30019	2.0	UCD_1
30027	2.0	UCD_1
30028	2.0	UCD_1
30144	2.0	BNI_1
30151	2.0	BNI_1
30230	2.0	U_MIA_1
30233	2.0	U_MIA_1
30239	2.0	U_MIA_1
30245	2.0	U_MIA_1
30247	2.0	U_MIA_1
30248	2.0	U_MIA_1
30251	2.0	U_MIA_1
51476	1.0	CALTECH
51478	1.0	CALTECH
51481	1.0	CALTECH
51483	1.0	CALTECH
51484	1.0	CALTECH
51485	1.0	CALTECH
51486	1.0	CALTECH
51487	1.0	CALTECH
51488	1.0	CALTECH
51489	1.0	CALTECH
51492	1.0	CALTECH
50659	1.0	CMU
50660	1.0	CMU
50663	1.0	CMU
50664	1.0	CMU
50665	1.0	CMU
50666	1.0	CMU
50668	1.0	CMU
50657	1.0	CMU
50667	1.0	CMU
50772	1.0	KKI
50773	1.0	KKI
50774	1.0	KKI
50775	1.0	KKI
50777	1.0	KKI
50781	1.0	KKI
50782	1.0	KKI
50785	1.0	KKI
50786	1.0	KKI
50789	1.0	KKI
50808	1.0	KKI
50809	1.0	KKI
50813	1.0	KKI
50816	1.0	KKI
50817	1.0	KKI
50818	1.0	KKI
50821	1.0	KKI
50822	1.0	KKI
50682	1.0	LEUVEN_1
50683	1.0	LEUVEN_1
50685	1.0	LEUVEN_1
50687	1.0	LEUVEN_1
50691	1.0	LEUVEN_1
50692	1.0	LEUVEN_1
50699	1.0	LEUVEN_1
50701	1.0	LEUVEN_1
50703	1.0	LEUVEN_1
50706	1.0	LEUVEN_1
50707	1.0	LEUVEN_1
50724	1.0	LEUVEN_2
50725	1.0	LEUVEN_2
50726	1.0	LEUVEN_2
50728	1.0	LEUVEN_2
50732	1.0	LEUVEN_2
50733	1.0	LEUVEN_2
50734	1.0	LEUVEN_2
50737	1.0	LEUVEN_2
50738	1.0	LEUVEN_2
50739	1.0	LEUVEN_2
50740	1.0	LEUVEN_2
50741	1.0	LEUVEN_2
50742	1.0	LEUVEN_2
51362	1.0	MAX_MUN
51363	1.0	MAX_MUN
51364	1.0	MAX_MUN
51365	1.0	MAX_MUN
51367	1.0	MAX_MUN
51369	1.0	MAX_MUN
51332	1.0	MAX_MUN
51333	1.0	MAX_MUN
51335	1.0	MAX_MUN
51336	1.0	MAX_MUN
51338	1.0	MAX_MUN
51339	1.0	MAX_MUN
51340	1.0	MAX_MUN
51341	1.0	MAX_MUN
51342	1.0	MAX_MUN
51343	1.0	MAX_MUN
51344	1.0	MAX_MUN
51345	1.0	MAX_MUN
51346	1.0	MAX_MUN
51347	1.0	MAX_MUN
51356	1.0	MAX_MUN
51357	1.0	MAX_MUN
51358	1.0	MAX_MUN
51359	1.0	MAX_MUN
51360	1.0	MAX_MUN
51361	1.0	MAX_MUN
51064	1.0	NYU
51065	1.0	NYU
51066	1.0	NYU
51067	1.0	NYU
51068	1.0	NYU
51069	1.0	NYU
51070	1.0	NYU
51071	1.0	NYU
51072	1.0	NYU
51074	1.0	NYU
51075	1.0	NYU
51076	1.0	NYU
51077	1.0	NYU
51078	1.0	NYU
51080	1.0	NYU
51081	1.0	NYU
51082	1.0	NYU
51083	1.0	NYU
51084	1.0	NYU
51085	1.0	NYU
51086	1.0	NYU
51087	1.0	NYU
51088	1.0	NYU
51089	1.0	NYU
51090	1.0	NYU
51091	1.0	NYU
51093	1.0	NYU
51094	1.0	NYU
51095	1.0	NYU
51096	1.0	NYU
51097	1.0	NYU
51098	1.0	NYU
51099	1.0	NYU
51100	1.0	NYU
51101	1.0	NYU
51102	1.0	NYU
51103	1.0	NYU
51105	1.0	NYU
51106	1.0	NYU
51107	1.0	NYU
51108	1.0	NYU
51109	1.0	NYU
51111	1.0	NYU
51112	1.0	NYU
51113	1.0	NYU
51114	1.0	NYU
51115	1.0	NYU
51116	1.0	NYU
51117	1.0	NYU
51118	1.0	NYU
51119	1.0	NYU
51120	1.0	NYU
51121	1.0	NYU
51122	1.0	NYU
51123	1.0	NYU
51124	1.0	NYU
51125	1.0	NYU
51126	1.0	NYU
51127	1.0	NYU
51129	1.0	NYU
51130	1.0	NYU
51131	1.0	NYU
51146	1.0	NYU
51148	1.0	NYU
51149	1.0	NYU
51150	1.0	NYU
51151	1.0	NYU
51152	1.0	NYU
51153	1.0	NYU
51154	1.0	NYU
51155	1.0	NYU
51156	1.0	NYU
51159	1.0	NYU
50157	1.0	OHSU
50158	1.0	OHSU
50159	1.0	OHSU
50160	1.0	OHSU
50161	1.0	OHSU
50162	1.0	OHSU
50163	1.0	OHSU
50164	1.0	OHSU
50165	1.0	OHSU
50166	1.0	OHSU
50167	1.0	OHSU
50168	1.0	OHSU
50169	1.0	OHSU
50170	1.0	OHSU
50171	1.0	OHSU
50102	1.0	OLIN
50103	1.0	OLIN
50104	1.0	OLIN
50106	1.0	OLIN
50107	1.0	OLIN
50108	1.0	OLIN
50109	1.0	OLIN
50110	1.0	OLIN
50111	1.0	OLIN
50112	1.0	OLIN
50115	1.0	OLIN
50116	1.0	OLIN
50117	1.0	OLIN
50030	1.0	PITT
50031	1.0	PITT
50032	1.0	PITT
50033	1.0	PITT
50034	1.0	PITT
50035	1.0	PITT
50037	1.0	PITT
50039	1.0	PITT
50040	1.0	PITT
50041	1.0	PITT
50042	1.0	PITT
50043	1.0	PITT
50044	1.0	PITT
50046	1.0	PITT
50047	1.0	PITT
50048	1.0	PITT
50050	1.0	PITT
50051	1.0	PITT
50052	1.0	PITT
50058	1.0	PITT
50060	1.0	PITT
51556	1.0	SBL
51557	1.0	SBL
51559	1.0	SBL
51560	1.0	SBL
51561	1.0	SBL
51562	1.0	SBL
51563	1.0	SBL
51564	1.0	SBL
51565	1.0	SBL
51567	1.0	SBL
51568	1.0	SBL
51569	1.0	SBL
50193	1.0	SDSU
50194	1.0	SDSU
50195	1.0	SDSU
50198	1.0	SDSU
50199	1.0	SDSU
50200	1.0	SDSU
50202	1.0	SDSU
50203	1.0	SDSU
50204	1.0	SDSU
50210	1.0	SDSU
50211	1.0	SDSU
50214	1.0	SDSU
50217	1.0	SDSU
51181	1.0	STANFORD
51182	1.0	STANFORD
51183	1.0	STANFORD
51185	1.0	STANFORD
51186	1.0	STANFORD
51187	1.0	STANFORD
51189	1.0	STANFORD
51193	1.0	STANFORD
51194	1.0	STANFORD
51195	1.0	STANFORD
51196	1.0	STANFORD
51197	1.0	STANFORD
51198	1.0	STANFORD
51199	1.0	STANFORD
50257	1.0	TRINITY
50259	1.0	TRINITY
50260	1.0	TRINITY
50261	1.0	TRINITY
50262	1.0	TRINITY
50263	1.0	TRINITY
50264	1.0	TRINITY
50265	1.0	TRINITY
50266	1.0	TRINITY
50267	1.0	TRINITY
50268	1.0	TRINITY
50269	1.0	TRINITY
50270	1.0	TRINITY
50271	1.0	TRINITY
51132	1.0	TRINITY
51133	1.0	TRINITY
51134	1.0	TRINITY
51135	1.0	TRINITY
51136	1.0	TRINITY
51137	1.0	TRINITY
51138	1.0	TRINITY
51139	1.0	TRINITY
51140	1.0	TRINITY
51141	1.0	TRINITY
51142	1.0	TRINITY
51250	1.0	UCLA_1
51251	1.0	UCLA_1
51252	1.0	UCLA_1
51253	1.0	UCLA_1
51254	1.0	UCLA_1
51255	1.0	UCLA_1
51256	1.0	UCLA_1
51257	1.0	UCLA_1
51258	1.0	UCLA_1
51259	1.0	UCLA_1
51260	1.0	UCLA_1
51261	1.0	UCLA_1
51263	1.0	UCLA_1
51265	1.0	UCLA_1
51266	1.0	UCLA_1
51268	1.0	UCLA_1
51269	1.0	UCLA_1
51271	1.0	UCLA_1
51272	1.0	UCLA_1
51273	1.0	UCLA_1
51274	1.0	UCLA_1
51275	1.0	UCLA_1
51276	1.0	UCLA_1
51278	1.0	UCLA_1
51280	1.0	UCLA_1
51281	1.0	UCLA_1
51304	1.0	UCLA_2
51306	1.0	UCLA_2
51308	1.0	UCLA_2
51309	1.0	UCLA_2
51311	1.0	UCLA_2
51312	1.0	UCLA_2
51314	1.0	UCLA_2
51315	1.0	UCLA_2
51316	1.0	UCLA_2
50329	1.0	UM_1
50330	1.0	UM_1
50331	1.0	UM_1
50332	1.0	UM_1
50333	1.0	UM_1
50334	1.0	UM_1
50335	1.0	UM_1
50337	1.0	UM_1
50339	1.0	UM_1
50342	1.0	UM_1
50344	1.0	UM_1
50346	1.0	UM_1
50347	1.0	UM_1
50349	1.0	UM_1
50350	1.0	UM_1
50351	1.0	UM_1
50352	1.0	UM_1
50355	1.0	UM_1
50358	1.0	UM_1
50359	1.0	UM_1
50360	1.0	UM_1
50362	1.0	UM_1
50363	1.0	UM_1
50365	1.0	UM_1
50366	1.0	UM_1
50367	1.0	UM_1
50368	1.0	UM_1
50370	1.0	UM_1
50371	1.0	UM_1
50372	1.0	UM_1
50376	1.0	UM_1
50378	1.0	UM_1
50381	1.0	UM_1
50382	1.0	UM_2
50383	1.0	UM_2
50385	1.0	UM_2
50386	1.0	UM_2
50388	1.0	UM_2
50390	1.0	UM_2
50391	1.0	UM_2
50415	1.0	UM_2
50416	1.0	UM_2
50417	1.0	UM_2
50418	1.0	UM_2
50419	1.0	UM_2
50421	1.0	UM_2
50422	1.0	UM_2
50424	1.0	UM_2
50425	1.0	UM_2
50426	1.0	UM_2
50428	1.0	UM_2
50432	1.0	USM
50433	1.0	USM
50434	1.0	USM
50436	1.0	USM
50437	1.0	USM
50438	1.0	USM
50439	1.0	USM
50441	1.0	USM
50442	1.0	USM
50443	1.0	USM
50444	1.0	USM
50445	1.0	USM
50447	1.0	USM
50448	1.0	USM
50449	1.0	USM
50450	1.0	USM
50451	1.0	USM
50452	1.0	USM
50453	1.0	USM
50454	1.0	USM
50455	1.0	USM
50456	1.0	USM
50457	1.0	USM
50460	1.0	USM
50461	1.0	USM
50464	1.0	USM
50465	1.0	USM
50466	1.0	USM
50467	1.0	USM
50468	1.0	USM
50469	1.0	USM
50470	1.0	USM
50471	1.0	USM
50472	1.0	USM
50473	1.0	USM
50474	1.0	USM
50551	1.0	YALE
50552	1.0	YALE
50553	1.0	YALE
50554	1.0	YALE
50556	1.0	YALE
50559	1.0	YALE
50560	1.0	YALE
50561	1.0	YALE
50562	1.0	YALE
50564	1.0	YALE
50566	1.0	YALE
50567	1.0	YALE
50568	1.0	YALE
50570	1.0	YALE
50571	1.0	YALE
50573	1.0	YALE
50574	1.0	YALE
50575	1.0	YALE
50577	1.0	YALE
50578	1.0	YALE
28701	2.0	OILH_2
28702	2.0	OILH_2
28705	2.0	OILH_2
28721	2.0	OILH_2
28727	2.0	OILH_2
28729	2.0	OILH_2
28733	2.0	OILH_2
28741	2.0	GU_1
28743	2.0	GU_1
28744	2.0	GU_1
28745	2.0	GU_1
28746	2.0	GU_1
28747	2.0	GU_1
28748	2.0	GU_1
28755	2.0	GU_1
28762	2.0	GU_1
28767	2.0	GU_1
28774	2.0	GU_1
28781	2.0	GU_1
28785	2.0	GU_1
28792	2.0	GU_1
28793	2.0	GU_1
28797	2.0	GU_1
28798	2.0	GU_1
28804	2.0	GU_1
28806	2.0	GU_1
28812	2.0	GU_1
28828	2.0	GU_1
28830	2.0	GU_1
28837	2.0	GU_1
28842	2.0	GU_1
28845	2.0	GU_1
28847	2.0	GU_1
28852	2.0	SDSU_1
28854	2.0	SDSU_1
28858	2.0	SDSU_1
28863	2.0	SDSU_1
28867	2.0	SDSU_1
28868	2.0	SDSU_1
28870	2.0	SDSU_1
28877	2.0	SDSU_1
28878	2.0	SDSU_1
28881	2.0	SDSU_1
28883	2.0	SDSU_1
28886	2.0	SDSU_1
28888	2.0	SDSU_1
28889	2.0	SDSU_1
28891	2.0	SDSU_1
28892	2.0	SDSU_1
28893	2.0	SDSU_1
28894	2.0	SDSU_1
28895	2.0	SDSU_1
28900	2.0	SDSU_1
28902	2.0	SDSU_1
28904	2.0	SDSU_1
28948	2.0	OHSU_1
28951	2.0	OHSU_1
28955	2.0	OHSU_1
28956	2.0	OHSU_1
28960	2.0	OHSU_1
28961	2.0	OHSU_1
28965	2.0	OHSU_1
28969	2.0	OHSU_1
28970	2.0	OHSU_1
28974	2.0	OHSU_1
28975	2.0	OHSU_1
28978	2.0	OHSU_1
28979	2.0	OHSU_1
28981	2.0	OHSU_1
28983	2.0	OHSU_1
28984	2.0	OHSU_1
28985	2.0	OHSU_1
28989	2.0	OHSU_1
28990	2.0	OHSU_1
28993	2.0	OHSU_1
28996	2.0	OHSU_1
28999	2.0	OHSU_1
29002	2.0	OHSU_1
29003	2.0	OHSU_1
29022	2.0	BNI_1
29032	2.0	BNI_1
29034	2.0	BNI_1
29035	2.0	BNI_1
29038	2.0	BNI_1
29044	2.0	BNI_1
29048	2.0	BNI_1
29050	2.0	BNI_1
29051	2.0	BNI_1
29056	2.0	BNI_1
29071	2.0	ETH_1
29072	2.0	ETH_1
29073	2.0	ETH_1
29074	2.0	ETH_1
29075	2.0	ETH_1
29076	2.0	ETH_1
29077	2.0	ETH_1
29078	2.0	ETH_1
29079	2.0	ETH_1
29080	2.0	ETH_1
29082	2.0	ETH_1
29083	2.0	ETH_1
29084	2.0	ETH_1
29085	2.0	ETH_1
29086	2.0	ETH_1
29087	2.0	ETH_1
29088	2.0	ETH_1
29089	2.0	ETH_1
29091	2.0	ETH_1
29092	2.0	ETH_1
29093	2.0	ETH_1
29094	2.0	ETH_1
29117	2.0	TCD_1
29118	2.0	TCD_1
29119	2.0	TCD_1
29121	2.0	TCD_1
29122	2.0	TCD_1
29124	2.0	TCD_1
29125	2.0	TCD_1
29126	2.0	TCD_1
29128	2.0	TCD_1
29130	2.0	TCD_1
29131	2.0	TCD_1
29132	2.0	TCD_1
29134	2.0	TCD_1
29135	2.0	TCD_1
29137	2.0	TCD_1
29225	2.0	NYU_1
29226	2.0	NYU_1
29227	2.0	NYU_1
29228	2.0	NYU_1
29230	2.0	NYU_1
29231	2.0	NYU_1
29232	2.0	NYU_1
29233	2.0	NYU_1
29234	2.0	NYU_1
29235	2.0	NYU_1
29236	2.0	NYU_1
29237	2.0	NYU_1
29238	2.0	NYU_1
29239	2.0	NYU_1
29240	2.0	NYU_1
29241	2.0	NYU_1
29243	2.0	NYU_1
29244	2.0	NYU_1
29245	2.0	NYU_1
29246	2.0	NYU_1
29247	2.0	NYU_1
29248	2.0	NYU_1
29249	2.0	NYU_1
29250	2.0	NYU_1
29251	2.0	NYU_1
29252	2.0	NYU_1
29254	2.0	NYU_1
29303	2.0	KKI_1
29305	2.0	KKI_1
29308	2.0	KKI_1
29310	2.0	KKI_1
29311	2.0	KKI_1
29313	2.0	KKI_1
29316	2.0	KKI_1
29317	2.0	KKI_1
29321	2.0	KKI_1
29323	2.0	KKI_1
29326	2.0	KKI_1
29327	2.0	KKI_1
29328	2.0	KKI_1
29330	2.0	KKI_1
29332	2.0	KKI_1
29338	2.0	KKI_1
29340	2.0	KKI_1
29341	2.0	KKI_1
29345	2.0	KKI_1
29347	2.0	KKI_1
29349	2.0	KKI_1
29350	2.0	KKI_1
29354	2.0	KKI_1
29359	2.0	KKI_1
29360	2.0	KKI_1
29361	2.0	KKI_1
29367	2.0	KKI_1
29368	2.0	KKI_1
29372	2.0	KKI_1
29373	2.0	KKI_1
29378	2.0	KKI_1
29379	2.0	KKI_1
29381	2.0	KKI_1
29382	2.0	KKI_1
29384	2.0	KKI_1
29386	2.0	KKI_1
29387	2.0	KKI_1
29388	2.0	KKI_1
29390	2.0	KKI_1
29396	2.0	KKI_1
29397	2.0	KKI_1
29399	2.0	KKI_1
29414	2.0	KKI_1
29423	2.0	KKI_1
29424	2.0	KKI_1
29425	2.0	KKI_1
29428	2.0	KKI_1
29431	2.0	KKI_1
29443	2.0	KKI_1
29447	2.0	KKI_1
29451	2.0	KKI_1
29452	2.0	KKI_1
29461	2.0	KKI_1
29464	2.0	KKI_1
29465	2.0	KKI_1
29467	2.0	KKI_1
29469	2.0	KKI_1
29471	2.0	KKI_1
29472	2.0	KKI_1
29473	2.0	KKI_1
29475	2.0	KKI_1
29476	2.0	KKI_1
29496	2.0	USM_1
29499	2.0	USM_1
29501	2.0	USM_1
29504	2.0	USM_1
29505	2.0	USM_1
29512	2.0	USM_1
29513	2.0	USM_1
29520	2.0	USM_1
29523	2.0	USM_1
29524	2.0	USM_1
29525	2.0	USM_1
29527	2.0	USM_1
29538	2.0	IU_1
29546	2.0	IU_1
29550	2.0	IU_1
29554	2.0	IU_1
29556	2.0	IU_1
29557	2.0	IU_1
29558	2.0	IU_1
29567	2.0	IU_1
29574	2.0	IU_1
29580	2.0	IP_1
29583	2.0	IP_1
29589	2.0	IP_1
29594	2.0	IP_1
29602	2.0	IP_1
29608	2.0	IP_1
29614	2.0	IP_1
29618	2.0	IP_1
29891	2.0	EMC_1
29893	2.0	EMC_1
29895	2.0	EMC_1
29897	2.0	EMC_1
29898	2.0	EMC_1
29900	2.0	EMC_1
29901	2.0	EMC_1
29902	2.0	EMC_1
29903	2.0	EMC_1
29904	2.0	EMC_1
29905	2.0	EMC_1
29906	2.0	EMC_1
29907	2.0	EMC_1
29908	2.0	EMC_1
29909	2.0	EMC_1
29910	2.0	EMC_1
29911	2.0	EMC_1
29912	2.0	EMC_1
29913	2.0	EMC_1
29914	2.0	EMC_1
29915	2.0	EMC_1
29916	2.0	EMC_1
30004	2.0	UCD_1
30007	2.0	UCD_1
30009	2.0	UCD_1
30015	2.0	UCD_1
30022	2.0	UCD_1
30023	2.0	UCD_1
30024	2.0	UCD_1
30029	2.0	UCD_1
30147	2.0	BNI_1
30155	2.0	OHSU_1
30159	2.0	OHSU_1
30160	2.0	OHSU_1
30232	2.0	U_MIA_1
30236	2.0	U_MIA_1
30240	2.0	U_MIA_1
30241	2.0	U_MIA_1
30244	2.0	U_MIA_1
30249	2.0	U_MIA_1
30250	2.0	U_MIA_1
30252	2.0	U_MIA_1
30255	2.0	U_MIA_1
